# Supplementary material
Source: PubMed Central journal article supplement (PMC7118668)

## Supplementary Online Content

Babic A, Sasamoto N, Rosner BA, et al. Association between breastfeeding and ovarian cancer risk. *JAMA Oncol*. Published online April 2, 2020. doi:10.1001/jamaoncol.2020.0421

**eTable 1.** Characteristics of 13 case-control studies from the Ovarian Cancer Association Consortium (1989-2009) included in the pooled analysis of breastfeeding and ovarian cancer risk

**eTable 2.** Characteristics of participants from 13 studies from the Ovarian Cancer Association Consortium (1989-2009) included in the pooled analysis of breastfeeding and ovarian cancer risk

**eTable 3.** Pooled odds ratios (ORs) and 95% confidence intervals (CIs) for the association between breastfeeding history and invasive ovarian cancer risk by selected characteristics in the Ovarian Cancer Association Consortium

**eTable 4.** Pooled odds ratios (ORs) and 95% confidence intervals (CIs) for the association between age and time since breastfeeding and invasive ovarian cancer risk in the Ovarian Cancer Association Consortium

**eTable 5.** Pooled odds ratios (ORs) and 95% confidence intervals (CIs) for the association between age and time since breastfeeding and invasive ovarian cancer risk among women with 2 births in the Ovarian Cancer Association Consortium

**eFigure.** Cross-classification of parity and breastfeeding in relation to invasive ovarian cancer and high-grade serous ovarian cancer risk in the Ovarian Cancer Association Consortium

This supplementary material has been provided by the authors to give readers additional information about their work.

**eTable 1.** Characteristics of 13 case-control studies from the Ovarian Cancer Association Consortium (1989-2009) included in the pooled analysis of breastfeeding and ovarian cancer risk

| Study | Reference                                                                                   | Study Period | Controls/Cases (Parous) | Among Controls                         |                      |                                                          |
|-------|---------------------------------------------------------------------------------------------|--------------|-------------------------|----------------------------------------|----------------------|----------------------------------------------------------|
|       |                                                                                             |              |                         | Parity (number of births) <sup>a</sup> | Ever breastfed N (%) | Breastfeeding duration per child (months) <sup>a,b</sup> |
| AUS   | Australian Ovarian Cancer Study <sup>37</sup>                                               | 2001-2006    | 1,287/ 1,218            | 2.7 (1.2)                              | 1,088 (85)           | 6.2 (4.5)                                                |
| CON   | Connecticut Ovarian Cancer Study <sup>38</sup>                                              | 1998-2003    | 477/ 394                | 2.6 (1.2)                              | 271 (57)             | 6.9 (5.6)                                                |
| DOV   | Diseases of the Ovary and their Evaluation <sup>40</sup>                                    | 2000-2009    | 1,563/ 1,171            | 2.6 (1.3)                              | 1,223 (78)           | 6.5 (6.5)                                                |
| GER   | German Ovarian Cancer Study <sup>41</sup>                                                   | 1993-1996    | 439/ 199                | 2.2 (1.1)                              | 305 (69)             | 3.4 (3.0)                                                |
| HAW   | Hawaii Ovarian Cancer Case-Control Study <sup>34</sup>                                      | 1999-2008    | 919/ 630                | 2.8 (1.5)                              | 688 (75)             | 7.0 (6.6)                                                |
| HOP   | Hormones and Ovarian Cancer Prediction Study <sup>35</sup>                                  | 2003-2008    | 1,573/ 639              | 2.7 (1.5)                              | 886 (56)             | 6.0 (5.4)                                                |
| MAL   | Malignant Ovarian Cancer Study <sup>33</sup>                                                | 1994-1999    | 1,418/ 616              | 2.3 (1.0)                              | 1,322 (93)           | 5.1 (4.5)                                                |
| NCO   | North Carolina Ovarian Cancer Study <sup>44</sup>                                           | 1998-2008    | 943/ 940                | 2.5 (1.4)                              | 391 (41)             | 6.3 (5.6)                                                |
| NEC   | New England Case Control Study <sup>42</sup>                                                | 1991-2003    | 1,877/ 1,532            | 2.8 (1.4)                              | 1,067 (57)           | 6.8 (6.2)                                                |
| NJO   | New Jersey Ovarian Cancer Study <sup>32</sup>                                               | 2004-2008    | 400/ 165                | 2.7 (1.3)                              | 184 (46)             | 6.9 (7.5)                                                |
| SON   | Southern Ontario Ovarian Cancer Study <sup>39</sup>                                         | 1989-1992    | 498/ 344                | 2.8 (1.5)                              | 325 (65)             | 4.9 (3.8)                                                |
| STA   | Family Registry for Ovarian Cancer and Genetic Epidemiology of Ovarian Cancer <sup>36</sup> | 1997-2001    | 431/ 409                | 2.4 (1.4)                              | 311 (72)             | 8.7 (6.8)                                                |
| USC   | University of Southern California Study of Lifestyle and Women's Health <sup>43</sup>       | 1999-2004    | 2,018/ 1,716            | 2.6 (1.4)                              | 1,356 (67)           | 6.6 (5.9)                                                |

<sup>a</sup>Mean (standard deviation)

<sup>b</sup>Per child that was breastfed

**eTable 2.** Characteristics of participants from 13 studies from the Ovarian Cancer Association Consortium (1989-2009) included in the pooled analysis of breastfeeding and ovarian cancer risk

|                                    | <b>Controls (N=13,843)</b> | <b>Cases (N=9,973)</b> |
|------------------------------------|----------------------------|------------------------|
| <b>Characteristics</b>             | <b>N (%)</b>               | <b>N (%)</b>           |
| <b>Age</b>                         |                            |                        |
| <45 years                          | 2,204 (16)                 | 1,283 (13)             |
| 45-<50 years                       | 1,758 (13)                 | 1,184 (12)             |
| 50-<55 years                       | 2,104 (15)                 | 1,495 (15)             |
| 55-<60 years                       | 2,097 (15)                 | 1,669 (17)             |
| 60-<65 years                       | 1,988 (14)                 | 1,592 (16)             |
| 65-<70 years                       | 1,651 (12)                 | 1,256 (16)             |
| ≥70 years                          | 2,041 (15)                 | 1,494 (15)             |
| <b>Birth Year</b>                  |                            |                        |
| <1930                              | 1,786 (13)                 | 1,381 (14)             |
| 1930-<1940                         | 3,058 (22)                 | 2,413 (24)             |
| 1940-<1950                         | 4,182 (30)                 | 3,213 (32)             |
| 1950-<1960                         | 3,285 (24)                 | 2,137 (21)             |
| ≥1960                              | 1,532 (11)                 | 829 (8)                |
| <b>Race</b>                        |                            |                        |
| White                              | 12,336 (89)                | 8,767 (88)             |
| Black                              | 453 (3)                    | 356 (3)                |
| Asian                              | 552 (4)                    | 469 (5)                |
| Other/ Unknown                     | 502 (4)                    | 381 (4)                |
| <b>Education</b>                   |                            |                        |
| Less than high school              | 2,330 (17)                 | 1,794 (18)             |
| High school                        | 3,235 (23)                 | 2,503 (25)             |
| Some college                       | 3,272 (24)                 | 2,437 (24)             |
| College                            | 3,807 (28)                 | 2,312 (23)             |
| Unknown                            | 1,199 (9)                  | 927 (9)                |
| <b>Menopausal Status</b>           |                            |                        |
| Peri/premenopausal                 | 4,501 (33)                 | 2,635 (26)             |
| Postmenopausal                     | 9,138 (66)                 | 7,227 (72)             |
| Unknown                            | 204 (1)                    | 111 (1)                |
| <b>Body Mass Index<sup>a</sup></b> |                            |                        |
| <20 kg/m <sup>2</sup>              | 5,273 (38)                 | 3,530 (35)             |
| 20-24.9 kg/m <sup>2</sup>          | 6,855 (50)                 | 4,901 (49)             |
| 25-29.9 kg/m <sup>2</sup>          | 857 (6)                    | 729 (7)                |
| ≥30 kg/m <sup>2</sup>              | 250 (2)                    | 204 (2)                |
| Unknown                            | 608 (4)                    | 609 (6)                |
| <b>Oral Contraceptive Use</b>      |                            |                        |
| Never users                        | 4,485 (32)                 | 4,014 (40)             |
| <1 year                            | 1,404 (10)                 | 1,226 (13)             |
| 1-<5 years                         | 3,384 (24)                 | 2,260 (23)             |
| 5-<10 years                        | 2,276 (16)                 | 1,312 (13)             |

|                                                     |             |            |
|-----------------------------------------------------|-------------|------------|
| ≥10 years                                           | 2,169 (16)  | 1,022 (10) |
| Unknown                                             | 125 (1)     | 139 (1)    |
| <b>Parity<sup>b</sup></b>                           |             |            |
| 1                                                   | 2,242 (16)  | 2,061 (21) |
| 2                                                   | 5,494 (40)  | 3,785 (38) |
| ≥3                                                  | 6,107 (44)  | 4,127 (41) |
| <b>Endometriosis</b>                                |             |            |
| No                                                  | 12,633 (91) | 8,810 (88) |
| Yes                                                 | 736 (5)     | 705 (7)    |
| Unknown                                             | 474 (3)     | 458 (5)    |
| <b>Family History of Ovarian Cancer<sup>c</sup></b> |             |            |
| No                                                  | 10,572 (76) | 7,068 (71) |
| Yes                                                 | 346 (3)     | 485 (5)    |
| Unknown                                             | 2,925 (21)  | 2,420 (24) |
| <b>Ever breastfed</b>                               |             |            |
| No                                                  | 4,426 (32)  | 3,992 (40) |
| Yes                                                 | 9,417 (68)  | 5,981 (60) |

<sup>a</sup>BMI in young adulthood

<sup>b</sup>Number of births with pregnancy period ≥ 6 months

<sup>c</sup>Ovarian cancer in first-degree relatives

**eTable 3.** Pooled odds ratios (ORs) and 95% confidence intervals (CIs) for the association between breastfeeding history and invasive ovarian cancer risk by selected characteristics in the Ovarian Cancer Association Consortium

|                                         | Never breastfed |             | Ever breastfed |             | OR (95% CI) <sup>a</sup> | p-interaction |
|-----------------------------------------|-----------------|-------------|----------------|-------------|--------------------------|---------------|
|                                         | Controls N (%)  | Cases N (%) | Controls N (%) | Cases N (%) |                          |               |
| <b>Age</b>                              |                 |             |                |             |                          | 0.09          |
| ≤ 50 years                              | 1,015 (23)      | 583 (18)    | 3,368 (36)     | 1,248 (26)  | 0.67 (0.59-0.77)         |               |
| > 50 years                              | 3,411 (77)      | 2,674 (82)  | 6,049 (64)     | 3,486 (74)  | 0.76 (0.71-0.82)         |               |
| <b>Body Mass Index<sup>b</sup></b>      |                 |             |                |             |                          | 0.50          |
| <25 kg/m <sup>2</sup>                   | 3,841 (90)      | 2,784 (90)  | 8,287 (92)     | 4,012 (91)  | 0.78 (0.72-0.83)         |               |
| 25-<30 kg/m <sup>2</sup>                | 290 (7)         | 249 (8)     | 567 (6)        | 327 (7)     | 0.76 (0.59-0.96)         |               |
| ≥30 kg/m <sup>2</sup>                   | 114 (3)         | 71 (2)      | 136 (2)        | 69 (2)      | 0.86 (0.52-1.43)         |               |
| <b>Endometriosis</b>                    |                 |             |                |             |                          | 0.23          |
| No                                      | 4,048 (94)      | 2,894 (92)  | 8,585 (95)     | 4,156 (93)  | 0.75 (0.70-0.80)         |               |
| Yes                                     | 240 (6)         | 250 (8)     | 496 (5)        | 329 (7)     | 0.66 (0.52-0.85)         |               |
| <b>Family history of ovarian cancer</b> |                 |             |                |             |                          | 0.18          |
| No                                      | 3,258 (96)      | 2,282 (93)  | 7,314 (97)     | 3,484 (93)  | 0.75 (0.70-0.81)         |               |
| Yes                                     | 121 (4)         | 161 (7)     | 216 (3)        | 249 (7)     | 0.88 (0.62-1.23)         |               |
| <b>Race</b>                             |                 |             |                |             |                          | 0.01          |
| White                                   | 3,933 (89)      | 2,917 (90)  | 8,403 (89)     | 4,119 (87)  | 0.73 (0.69-0.79)         |               |
| Black                                   | 245 (6)         | 147 (5)     | 208 (2)        | 129 (3)     | 0.92 (0.66-1.29)         |               |
| Asian                                   | 120 (3)         | 103 (3)     | 432 (5)        | 292 (6)     | 0.81 (0.58-1.12)         |               |

<sup>a</sup>Adjusted for age, race, OC use, parity, birth decade, and study site, excluding the stratifying variable.

<sup>b</sup>BMI in young adulthood

**eTable 4.** Pooled odds ratios (ORs) and 95% confidence intervals (CIs) for the association between age and time since breastfeeding and invasive ovarian cancer risk in the Ovarian Cancer Association Consortium

|                                                          | All invasive      |                |                         | High-grade serous |                         |
|----------------------------------------------------------|-------------------|----------------|-------------------------|-------------------|-------------------------|
|                                                          | Controls<br>N (%) | Cases<br>N (%) | OR (95%CI) <sup>a</sup> | Cases<br>N (%)    | OR (95%CI) <sup>a</sup> |
| <b>Age at first breastfeeding episode<sup>b,c</sup></b>  |                   |                |                         |                   |                         |
| Never breastfed                                          | 4,426 (32)        | 3,257 (41)     | 1.00 (Ref)              | 1,978 (42)        | 1.00 (Ref)              |
| <25 years                                                | 4,271 (32)        | 2,393 (30)     | 0.86 (0.79-0.93)        | 1,411 (30)        | 0.81 (0.74-0.90)        |
| 25-<30 years                                             | 2,962 (21)        | 1,379 (17)     | 0.77 (0.70-0.84)        | 786 (17)          | 0.78 (0.69-0.87)        |
| ≥30 years                                                | 2,158 (16)        | 937 (12)       | 0.74 (0.66-0.82)        | 528 (11)          | 0.78 (0.68-0.89)        |
| p-trend <sup>d</sup>                                     |                   |                | 0.001                   |                   | 0.11                    |
| p-trend <sup>d,g</sup>                                   |                   |                | 0.14                    |                   | 0.56                    |
| <b>Age at last breastfeeding episode<sup>e,f</sup></b>   |                   |                |                         |                   |                         |
| Never breastfed                                          | 4,426 (32)        | 3,257 (41)     | 1.00 (Ref)              | 1,978 (42)        | 1.00 (Ref)              |
| <25 years                                                | 1,816 (13)        | 1,184 (15)     | 0.92 (0.84-1.01)        | 684 (15)          | 0.88 (0.79-0.98)        |
| 25-<30 years                                             | 2,745 (20)        | 1,428 (18)     | 0.78 (0.72-0.86)        | 803 (17)          | 0.76 (0.68-0.84)        |
| 30-<35 years                                             | 2,840 (21)        | 1,310 (16)     | 0.75 (0.68-0.83)        | 761 (16)          | 0.77 (0.69-0.87)        |
| ≥35 years                                                | 1,996 (14)        | 787 (10)       | 0.67 (0.59-0.77)        | 477 (10)          | 0.72 (0.62-0.84)        |
| p-trend <sup>d</sup>                                     |                   |                | 0.02                    |                   | 0.15                    |
| p-trend <sup>d,g</sup>                                   |                   |                | 0.26                    |                   | 0.60                    |
| <b>Time since last breastfeeding episode<sup>e</sup></b> |                   |                |                         |                   |                         |
| Never breastfed                                          | 4,426 (32)        | 3,257 (41)     | 1.00 (Ref)              | 1,978 (42)        | 1.00 (Ref)              |
| <10 years                                                | 1,315 (10)        | 332 (4)        | 0.56 (0.47-0.66)        | 115 (2)           | 0.44 (0.35-0.57)        |
| 10-<20 years                                             | 1,975 (14)        | 807 (10)       | 0.75 (0.66-0.84)        | 442 (9)           | 0.78 (0.67-0.91)        |
| 20-<30 years                                             | 2,299 (17)        | 1,232 (15)     | 0.86 (0.78-0.95)        | 716 (15)          | 0.86 (0.76-0.97)        |
| ≥30 years                                                | 3,802 (28)        | 2,338 (29)     | 0.83 (0.77-0.90)        | 1,452 (31)        | 0.80 (0.73-0.89)        |
| p-trend <sup>d</sup>                                     |                   |                | 0.02                    |                   | 0.05                    |

<sup>a</sup>Adjusted for age, race, OC use, parity, birth decade, study site, and total duration of breastfeeding

<sup>b</sup>Additionally adjusted for age at first birth

<sup>c</sup>Range of age at first breastfeeding: 15-48 years

<sup>d</sup>Among women having ever breastfed

<sup>e</sup>Additionally adjusted for age at last birth

<sup>f</sup>Range of age at last breastfeeding: 15-52 years

<sup>g</sup>Mutually adjusted for age at first and last breastfeeding episode

**eTable 5.** Pooled odds ratios (ORs) and 95% confidence intervals (CIs) for the association between age and time since breastfeeding and invasive ovarian cancer risk among women with 2 births in the Ovarian Cancer Association Consortium

|                                                            | All invasive      |                |                         | High-grade serous |                         |
|------------------------------------------------------------|-------------------|----------------|-------------------------|-------------------|-------------------------|
|                                                            | Controls<br>N (%) | Cases<br>N (%) | OR (95%CI) <sup>a</sup> | Cases<br>N (%)    | OR (95%CI) <sup>a</sup> |
| <b>Age at first breastfeeding episode<sup>b,c</sup></b>    |                   |                |                         |                   |                         |
| Never breastfed                                            | 1,726 (31)        | 1,257 (41)     | 1.00 (Ref)              | 765 (43)          | 1.00 (Ref)              |
| <25 years                                                  | 1,352 (25)        | 748 (25)       | 0.86 (0.75-0.99)        | 421 (24)          | 0.80 (0.67-0.95)        |
| 25-<30 years                                               | 1,379 (25)        | 630 (21)       | 0.79 (0.68-0.91)        | 342 (19)          | 0.75 (0.62-0.89)        |
| ≥30 years                                                  | 1,027 (19)        | 402 (13)       | 0.72 (0.60-0.86)        | 241 (14)          | 0.76 (0.61-0.95)        |
| p-trend <sup>d</sup>                                       |                   |                | 0.001                   |                   | 0.08                    |
| p-trend <sup>d,g</sup>                                     |                   |                | 0.05                    |                   | 0.27                    |
| <b>Age at last breastfeeding episode<sup>e,f</sup></b>     |                   |                |                         |                   |                         |
| Never breastfed                                            | 1,726 (31)        | 1,257 (41)     | 1.00 (Ref)              | 765 (43)          | 1.00 (Ref)              |
| <25 years                                                  | 674 (12)          | 420 (14)       | 0.92 (0.78-1.08)        | 241 (14)          | 0.86 (0.71-1.05)        |
| 25-<30 years                                               | 1,249 (23)        | 613 (20)       | 0.79 (0.68-0.91)        | 330 (19)          | 0.73 (0.61-0.87)        |
| 30-<35 years                                               | 1,169 (21)        | 494 (16)       | 0.75 (0.63-0.88)        | 270 (15)          | 0.73 (0.60-0.89)        |
| ≥35 years                                                  | 666 (12)          | 253 (8)        | 0.68 (0.54-0.85)        | 163 (9)           | 0.76 (0.58-1.00)        |
| p-trend <sup>d</sup>                                       |                   |                | 0.14                    |                   | 0.33                    |
| p-trend <sup>d,g</sup>                                     |                   |                | 0.90                    |                   | 0.99                    |
| <b>Time since last breastfeeding episode<sup>e,f</sup></b> |                   |                |                         |                   |                         |
| Never breastfed                                            | 1,726 (31)        | 1,257 (41)     | 1.00 (Ref)              | 765 (43)          | 1.00 (Ref)              |
| <10 years                                                  | 593 (11)          | 151 (5)        | 0.62 (0.47-0.82)        | 66 (4)            | 0.59 (0.41-0.86)        |
| 10-<20 years                                               | 882 (16)          | 337 (11)       | 0.74 (0.61-0.90)        | 192 (11)          | 0.77 (0.60-0.98)        |
| 20-<30 years                                               | 1,015 (19)        | 516 (17)       | 0.84 (0.72-0.99)        | 286 (16)          | 0.78 (0.64-0.94)        |
| ≥30 years                                                  | 1,268 (23)        | 776 (26)       | 0.82 (0.72-0.95)        | 460 (26)          | 0.78 (0.66-0.92)        |
| p-trend <sup>d</sup>                                       |                   |                | 0.15                    |                   | 0.09                    |

<sup>a</sup>Adjusted for age, race, OC use, parity, birth decade, study site, and total duration of breastfeeding

<sup>b</sup>Additionally adjusted for age at first birth

<sup>c</sup>Range of age at first breastfeeding: 15-48 years

<sup>d</sup>Among women having ever breastfed

<sup>e</sup>Additionally adjusted for age at last birth

<sup>f</sup>Range of age at last breastfeeding: 15-52 years

<sup>g</sup>Mutually adjusted for age at first and last breastfeeding episode

**eFigure.** Cross-classification of parity and breastfeeding in relation to invasive ovarian cancer and high-grade serous ovarian cancer risk in the Ovarian Cancer Association Consortium

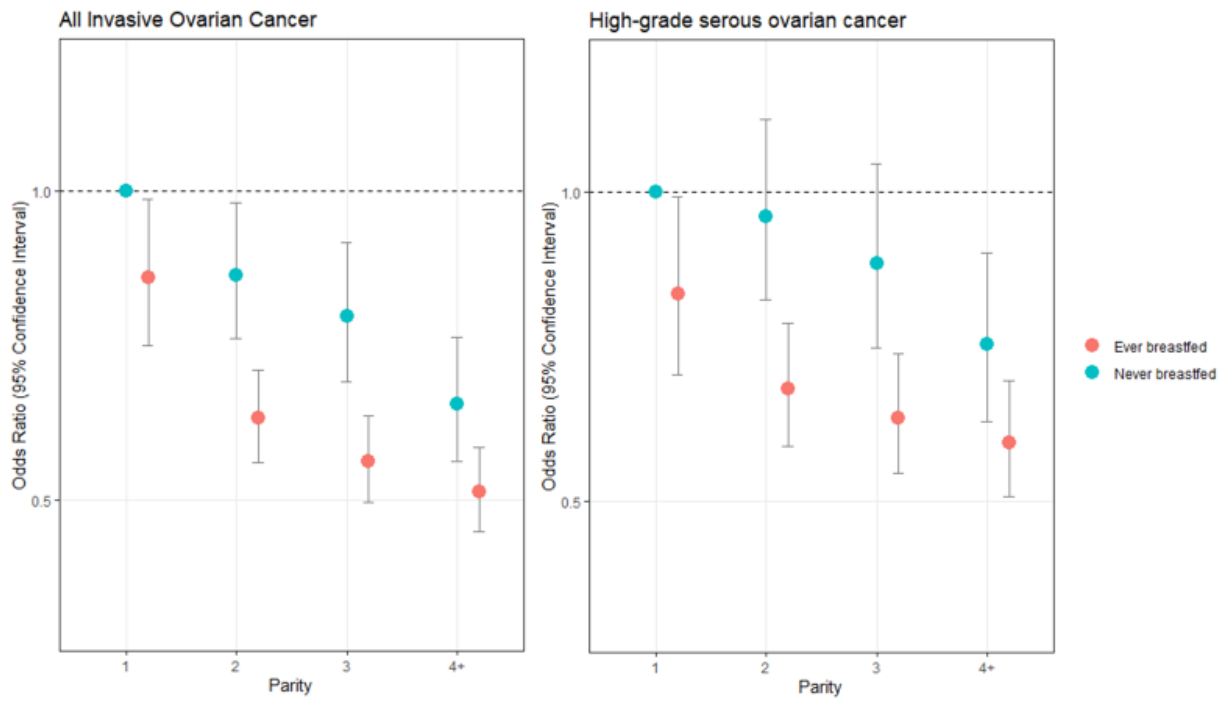

Supplement: jamaoncol-6-e200421-s001.pdf [file jamaoncol-6-e200421-s001.pdf]
